# Supplementary material for: Tuning the Wettability of a Commercial Silane Product to Induce Superamphiphobicity for Stone Protection
Source: MDPI journal article supplement (doi:10.3390/coatings13040700), 2023-03-30
Supplement: s1 [file s1]

Archive with 1 entries (1 files):
- coatings-2275387-supplementary.pdf
